# Supplementary material for: Intermolecular interactions and chiral crystallization effects in (1,5,3-dithiazepan-3-yl)-alkanoic acids
Source: Royal Society of Chemistry journal article supplement (doi:10.1039/c6ce00708b), 2016-01-01
Supplement: c6ce00708b1.pdf [file c6ce00708b1.pdf]

## Intermolecular Interactions and Chiral Crystallization Effects in (1,5,3-Dithiazepan-3-yl)-alkanoic Acids

Arthur R. Tulyabaev, Ekaterina S. Mescheryakova, Guzel R. Khabibullina, and Leonard M. Khalilov\*

Institute of Petrochemistry and Catalysis, Russian Academy of Sciences  
141 Prospekt Oktyabrya, Ufa 450075, Russian Federation  
Phone/Fax: +73472842750, e-mail: khalilovlm@gmail.com

### Supporting information

**Table 1** Common occurrence of N–OH and amino acid fragments in the compounds according to found results in Cambridge Structural Database

|                     |                                                                                    |                                                                                    |                                                                                     |                                                                                     |
|---------------------|------------------------------------------------------------------------------------|------------------------------------------------------------------------------------|-------------------------------------------------------------------------------------|-------------------------------------------------------------------------------------|
| Structural fragment | 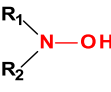  |   |   |  |
| Number of compounds | 1856                                                                               | 398                                                                                | 99                                                                                  | 24                                                                                  |
| Structural fragment |  |  |  |                                                                                     |
| Number of compounds | 81                                                                                 | 70                                                                                 | 34                                                                                  |                                                                                     |

**Table 2** Some bond, Å

|               | 1         | 2a        | 2b        | 3        | 4        | 5         | 6                        | 7                       | 8          |
|---------------|-----------|-----------|-----------|----------|----------|-----------|--------------------------|-------------------------|------------|
| S1-mean plane | 1.139(4)  | 1.110(3)  | -0.710(4) | 0.867(4) | 0.717(5) | -1.114(3) | 1.110 (6)<br>(-1.087(5)) | -1.118(3)<br>(1.098(4)) | 1.126(17)  |
| S5-mean plane | -1.084(3) | -1.105(2) | -0.836(3) | 0.815(2) | 0.842(6) | 1.107(5)  | -1.108(4)<br>(1.124(5))  | 1.126(3)<br>(-1.138(5)) | -1.112(16) |

**Table 3** Some bonds, Å

|           | 1         | 2a        | 2b        | 3        | 4         | 5         | 6        | 7        | 8         |
|-----------|-----------|-----------|-----------|----------|-----------|-----------|----------|----------|-----------|
| C(2)–N(3) | 1.461(18) | 1.513(16) | 1.435(19) | 1.437(3) | 1.426(2)  | 1.469(3)  | 1.519(4) | 1.460(4) | 1.467(2)  |
| C(4)–N(3) | 1.469(2)  | 1.498(2)  | 1.433(17) | 1.429(3) | 1.430(2)  | 1.482(3)  | 1.508(6) | 1.482(4) | 1.476(2)  |
| C(4)–S(5) | 1.794(2)  | 1.788(5)  | 1.836(15) | 1.816(3) | 1.846(18) | 1.802(2)  | 1.786(4) | 1.806(3) | 1.796(16) |
| C(2)–S(1) | 1.814(14) | 1.788(17) | 1.842(14) | 1.829(3) | 1.845(16) | 1.824(19) | 1.794(4) | 1.815(3) | 1.818(19) |
| N(3)–C(8) | –         | 1.493(2)  | 1.442(17) | 1.463(4) | 1.461(2)  | 1.496(2)  | 1.517(4) | 1.487(4) | 1.491(2)  |

**Table 4** Hydrogen bonds and diverse intermolecular contacts

| Compound  | D–H...A     | d(D–H)   | d(H...A) | d(D...A) | (D–H...A) | Symmetry code      |
|-----------|-------------|----------|----------|----------|-----------|--------------------|
| <b>1</b>  | O1–H1...H1  | 0.870(6) | 2.192(2) | 2.656(2) | 113.05(6) | 1–x, 1–y, –z       |
|           | C4–H4B...S1 | 0.952(6) | 2.947(2) | 3.654(3) | 132.11(5) | –1+x, y, z         |
|           | O1–H1...O1  | 0.870(6) | 2.656(2) | 3.289(3) | 130.59(4) | 1–x, 1–y, –z       |
|           | C7–H7A...O1 | 0.982(9) | 2.509(2) | 3.283(3) | 135.62(4) | x, –1+y, z         |
|           | O1–H1...N3  | 0.870(3) | 2.006(4) | 2.850(3) | 163.30(2) | 1–x, 1–y, –z       |
| <b>2a</b> | C2–H2A...O1 | 0.920(4) | 2.706(2) | 3.448(2) | 138.30(2) | –2–x, –0.5+y, –2–z |
|           | C8–H8B...O1 | 1.092(5) | 2.154(5) | 3.212(2) | 162.67(4) | –2–x, –0.5+y, –2–z |
|           | O3–H3B...O2 | 0.850(4) | 1.869(9) | 2.701(1) | 165.75(9) | x, y, z            |
|           | O2–H2...O3  | 0.820(3) | 2.087(8) | 2.703(9) | 131.81(2) | –3–x, –0.5+y, –2–z |

|           |              |          |          |          |           |                       |
|-----------|--------------|----------|----------|----------|-----------|-----------------------|
|           | O3–H3A…O1    | 0.850(3) | 2.636(1) | 3.339(2) | 140.93(2) | –2–x, –0.5+y, –2–z    |
|           | C7–H7A…S1    | 1.026(5) | 2.914(2) | 3.919(2) | 166.61(1) | –1–x, –0.5+y, –1–z    |
|           | C4–H4A…S5    | 0.934(3) | 2.917(1) | 3.547(2) | 125.93(2) | –2–x, –0.5+y, –1–z    |
| <b>2b</b> | C1'–H1'B…S5  | 0.960(2) | 2.765(5) | 3.477(7) | 131.57(1) | 2–x, –0.5+y, 1.5–z    |
|           | C7–H7A…S5    | 0.935(3) | 2.945(8) | 3.773(1) | 149.27(1) | x, 1.5–y, –0.5+z      |
|           | C1'–H1'C…O1  | 0.960(3) | 2.448(5) | 3.282(7) | 145.17(7) | x, y, z               |
|           | O2–H2…O1'    | 0.830(2) | 1.772(5) | 2.592(6) | 169.35(9) | x, y, z               |
|           | C6–H6B…O1    | 0.966(2) | 2.710(6) | 3.675(8) | 175.55(1) | 2–x, 1–y, 2–z         |
| <b>3</b>  | C2–H2B…H8B   | 0.970(1) | 2.323(2) | 3.115(2) | 138.37(3) | –1+x, y, z            |
|           | C8–H8A…S5    | 0.970(5) | 2.969(2) | 3.899(2) | 160.92(1) | x, y, –1+z            |
|           | C7–H7A…S1    | 0.970(6) | 2.914(2) | 3.815(3) | 154.87(1) | –0.5+x, 0.5–y, –0.5+z |
|           | C9–H9A…O2    | 0.970(5) | 2.489(2) | 3.453(2) | 172.83(3) | 1–x, 1–y, 2–z         |
|           | C9–H9B…O2    | 0.970(8) | 2.700(2) | 3.609(2) | 156.36(6) | –1+x, y, z            |
|           | O1–H1…O2     | 0.879(9) | 1.771(2) | 2.641(2) | 170.26(8) | –x, 1–y, 1–z          |
| <b>4</b>  | O2–H2C…O1    | 0.783(6) | 1.854(1) | 2.631(2) | 172.07(8) | –x, 3–y, –z           |
|           | C10–H10B…O2  | 0.991(5) | 2.544(1) | 3.442(2) | 150.55(3) | –x, 2–y, –z           |
|           | C9–H9A…O2    | 1.000(9) | 2.686(2) | 3.539(2) | 143.48(9) | –1+x, y, z            |
| <b>5</b>  | C9–H9A…S5    | 0.980(5) | 2.885(2) | 3.524(2) | 123.65(4) | –1+x, y, z            |
|           | C7–H7A…O2    | 0.888(5) | 2.704(2) | 3.424(2) | 138.93(3) | –x, –0.5+y, 1–z       |
|           | C7–H7A…O1    | 0.888(5) | 2.707(2) | 3.461(2) | 143.31(3) | x, y, –1+z            |
|           | C2–H2B…O1    | 0.971(7) | 2.701(1) | 3.211(2) | 113.36(5) | –x, –0.5+y, –z        |
|           | C9–H9B…O1    | 1.006(5) | 2.716(2) | 3.354(2) | 121.52(5) | –x, –0.5+y, –z        |
| <b>6</b>  | C11–H11B…H6A | 0.960(6) | 2.196(9) | 2.984(1) | 138.61(9) | –1.5–x, –1–y, –0.5+z  |
|           | C13–H13B…H6A | 0.960(6) | 2.263(9) | 3.035(1) | 136.91(2) | –1.5–x, –1–y, –0.5+z  |
|           | C4–H4B…H2'   | 0.939(5) | 2.328(9) | 2.523(1) | 90.84(5)  | –0.5+x, –1.5–y, –1–z  |
|           | C2'–H2'A…S5  | 0.998(5) | 2.970(1) | 3.755(2) | 136.33(4) | x, y, z               |
|           | C13–H13C…S5' | 0.960(6) | 2.973(2) | 3.900(2) | 162.60(2) | –0.5+x, –0.5–y, –1–z  |
|           | C8–H8…O1'    | 0.986(5) | 2.691(2) | 3.594(2) | 152.35(6) | x, y, z               |
|           | C4–H4A…O1'   | 0.904(4) | 2.353(1) | 3.257(1) | 178.65(4) | x, y, z               |
|           | C2–H2A…O1'   | 0.970(5) | 2.677(2) | 3.198(2) | 114.04(2) | –0.5+x, –1.5–y, –1–z  |
|           | C2'–H2'B…O2  | 0.989(6) | 2.603(1) | 3.299(2) | 127.41(5) | –0.5+x, –0.5–y, –1–z  |
|           | C4'–H4'B…O2  | 0.970(4) | 2.319(1) | 3.164(5) | 145.16(9) | –1+x, y, z            |
| <b>7</b>  | C2–H2A…H2'   | 0.977(2) | 2.398(3) | 2.768(5) | 102.09(1) | x, y, z               |
|           | C4–H4B…O3    | 0.917(9) | 2.645(4) | 3.170(4) | 117.19(8) | –1+x, y, z            |
|           | C6–H6A…O1    | 0.970(2) | 2.624(3) | 3.593(5) | 176.72(9) | –1+x, y, 1+z          |
|           | C7–H7A…O3    | 1.037(1) | 2.642(3) | 3.398(4) | 129.55(9) | –1+x, y, 1+z          |
|           | O1–H1A…O3    | 0.686(1) | 1.977(3) | 2.640(4) | 162.72(3) | x, –1+y, z            |
|           | C7–H7A…O3'   | 1.037(2) | 2.399(3) | 3.184(4) | 131.62(9) | x, –1+y, 1+z          |
|           | O2'–H2'…O2   | 0.820(1) | 2.593(3) | 3.141(4) | 125.55(1) | x, y, z               |
|           | O1'–H1'…O3'  | 0.820(1) | 2.025(4) | 2.674(5) | 135.72(9) | 1+x, y, z             |
|           | C6'–H6'B…O3' | 0.970(2) | 2.396(5) | 3.228(7) | 143.60(9) | –1+x, y, 1+z          |
|           | C9–H9B…S1'   | 0.970(2) | 2.950(4) | 3.618(6) | 127.02(1) | x, –1+y, 1+z          |
|           | C9'–H9'B…S5' | 1.083(1) | 2.638(3) | 3.659(5) | 156.90(4) | x, y, z               |
| <b>8</b>  | C4–H4B…H7A   | 1.006(3) | 2.373(6) | 2.745(7) | 100.77(1) | –0.5+x, y, 1.5–z      |
|           | C13–H13…S1   | 0.977(3) | 2.942(8) | 3.775(9) | 143.90(3) | –0.5+x, 0.5–y, 1–z    |
|           | O1–H1…C8     | 0.910(3) | 2.639(8) | 3.404(1) | 142.14(2) | 1.5–x, –0.5+y, z      |
|           | O1–H1…C4     | 0.910(3) | 2.493(6) | 3.257(8) | 141.70(1) | 1.5–x, –0.5+y, z      |
|           | O1–H1…C2     | 0.910(3) | 2.641(7) | 3.487(1) | 154.97(9) | 1.5–x, –0.5+y, z      |
|           | C7–H7A…C4    | 0.979(2) | 2.745(7) | 3.524(9) | 136.87(1) | –0.5+x, y, 1.5–z      |

**Table 5** S…S contacts vs conformation of dithiazepane cycle

|                   | 1        | 2a    | 2b   | 3    | 4    | 5        | 6     | 7        | 8        |
|-------------------|----------|-------|------|------|------|----------|-------|----------|----------|
| <i>d</i> (S…S), Å | 3.598(5) | –     | –    | –    | –    | 3.380(4) | –     | 3.596(7) | 3.568(8) |
| Conformation      | chair    | chair | boat | boat | boat | chair    | chair | chair    | chair    |

**Table 6** Crystal data and structure refinement for compounds 1–8

|                       | 1                                                                          | 2a                                                                              | 2b                                                                                                  | 3                                                             |
|-----------------------|----------------------------------------------------------------------------|---------------------------------------------------------------------------------|-----------------------------------------------------------------------------------------------------|---------------------------------------------------------------|
| <b>I formula</b>      | C <sub>4</sub> H <sub>9</sub> N <sub>1</sub> O <sub>1</sub> S <sub>2</sub> | C <sub>6</sub> H <sub>11</sub> NO <sub>2</sub> S <sub>2</sub> ·H <sub>2</sub> O | C <sub>6</sub> H <sub>11</sub> NO <sub>2</sub> S <sub>2</sub> ,<br>C <sub>2</sub> H <sub>6</sub> OS | C <sub>7</sub> H <sub>13</sub> NO <sub>2</sub> S <sub>2</sub> |
| <b>Formula weight</b> | 151.24                                                                     | 211.29                                                                          | 271.41                                                                                              | 206.30                                                        |
| <b>Crystal</b>        | triclinic                                                                  | monoclinic                                                                      | monoclinic                                                                                          | monoclinic                                                    |

|                                                  |                       |                                  |                                  |                                  |
|--------------------------------------------------|-----------------------|----------------------------------|----------------------------------|----------------------------------|
| <b>system</b>                                    |                       |                                  |                                  |                                  |
| <b>Space group</b>                               | P-1                   | P2 <sub>1</sub>                  | P2 <sub>1</sub> /c               | P2 <sub>1</sub> /n               |
| <b>a, Å</b>                                      | 6.5256(4)             | 6.6882(3)Å                       | 6.58182(17)                      | 4.9212(5)                        |
| <b>b, Å</b>                                      | 6.9753(5)             | 8.6039(4)                        | 16.4019(4)                       | 30.519(2)                        |
| <b>c, Å</b>                                      | 8.1848(5)             | 8.0793(4)                        | 11.5843(4)                       | 6.7336(4)                        |
| <b>α, °</b>                                      | 110.266(6)            | 90.00°                           | 90.00°                           | 90                               |
| <b>β, °</b>                                      | 96.816(5)             | 94.507(5)                        | 98.923(3)                        | 103.709(8)                       |
| <b>γ, °</b>                                      | 94.924(5)             | 90.00°                           | 90.00°                           | 90                               |
| <b>V, Å<sup>3</sup></b>                          | 343.79(4)             | 463.48(4)                        | 1235.44(6)                       | 982.53(14)                       |
| <b>Z</b>                                         | 2                     | 2                                | 4                                | 4                                |
| <b>D<sub>calc</sub>/cm<sup>3</sup></b>           | 1.461                 | 1.514                            | 1.459                            | 1.395                            |
| <b>F(000)</b>                                    | 160                   | 224                              | 576.0                            | 436                              |
| <b>2θ<sub>max</sub>, °</b>                       | 62.34°                | 62.378                           | 62.2                             | 62.42                            |
| <b>Reflections collected</b>                     | 2975                  | 2436                             | 6313                             | 3485                             |
| <b>Independent reflections (R<sub>int</sub>)</b> | 1957[R(int) = 0.0115] | 2054 (R <sub>int</sub> = 0.0084) | 3538 (R <sub>int</sub> = 0.0137) | 2291 (R <sub>int</sub> = 0.0168) |
| <b>S</b>                                         | 0.857                 | 0.853                            | 1.067                            | 1.057                            |
| <b>R<sub>1</sub> [I ≥ 2σ(I)]</b>                 | 0.0274                | 0.0303                           | 0.0318                           | 0.0536                           |
| <b>wR<sub>2</sub></b>                            | 0.1031                | 0.0888                           | 0.0762                           | 0.1448                           |
| <b>Largest diff. peak/hole, e Å<sup>-3</sup></b> | 0.34/-0.22            | 0.44/-0.50                       | 0.30/-0.27                       | 0.50/-0.63                       |
| <b>Flack parameter</b>                           | n/a                   | -0.13(7)                         | n/a                              | n/a                              |

|                          | <b>4</b>                                                      | <b>5</b>                                                      | <b>6</b>                                                      | <b>7</b>                                                       | <b>8</b>                                                       |
|--------------------------|---------------------------------------------------------------|---------------------------------------------------------------|---------------------------------------------------------------|----------------------------------------------------------------|----------------------------------------------------------------|
| <b>Empirical formula</b> | C <sub>8</sub> H <sub>15</sub> NO <sub>2</sub> S <sub>2</sub> | C <sub>7</sub> H <sub>13</sub> NO <sub>2</sub> S <sub>2</sub> | C <sub>7</sub> H <sub>13</sub> NO <sub>3</sub> S <sub>2</sub> | C <sub>10</sub> H <sub>19</sub> NO <sub>2</sub> S <sub>2</sub> | C <sub>13</sub> H <sub>17</sub> NO <sub>2</sub> S <sub>2</sub> |
| <b>Formula weight</b>    | 221.33                                                        | 207.30                                                        | 223.30                                                        | 249.38                                                         | 283.4                                                          |
| <b>Crystal system</b>    | triclinic                                                     | monoclinic                                                    | triclinic                                                     | orthorhombic                                                   | orthorhombic                                                   |
| <b>Space group</b>       | P-1                                                           | P2 <sub>1</sub>                                               | P1                                                            | P2 <sub>1</sub> 2 <sub>1</sub> 2 <sub>1</sub>                  | Pbca                                                           |
| <b>a, Å</b>              | 5.0968(3)                                                     | 6.4993(6)                                                     | 6.8616(11)                                                    | 10.6926(6)                                                     | 10.5874(4)                                                     |
| <b>b, Å</b>              | 6.7869(3)                                                     | 8.6630(6)                                                     | 8.8688(8)                                                     | 10.9871(7)                                                     | 10.2833(3)                                                     |
| <b>c, Å</b>              | 16.6360(10)                                                   | 8.5034(5)                                                     | 8.9458(10)                                                    | 21.4364(15)                                                    | 25.2185(10)                                                    |
| <b>α, °</b>              | 78.801(5)                                                     | 90                                                            | 66.923(10)                                                    | 90                                                             | 90                                                             |

|                                              |                                    |                                    |                                    |                                    |                                    |
|----------------------------------------------|------------------------------------|------------------------------------|------------------------------------|------------------------------------|------------------------------------|
| $\beta, ^\circ$                              | 87.344(5)                          | 104.738(7)                         | 70.122(13)                         | 90                                 | 90                                 |
| $\gamma, ^\circ$                             | 69.141(5)                          | 90                                 | 85.373(10)                         | 90                                 | 90                                 |
| $V, \text{\AA}^3$                            | 527.34(5)                          | 463.01(6)                          | 470.11(11)                         | 2518.3(3)                          | 2745.64(17)                        |
| $Z$                                          | 2                                  | 2                                  | 2                                  | 8                                  | 8                                  |
| $D_{\text{calc}}/\text{cm}^3$                | 1.394                              | 1.487                              | 1.577                              | 1.316                              | 1.371                              |
| $F(000)$                                     | 236                                | 220.0                              | 236.0                              | 1072.0                             | 1200                               |
| $2\theta_{\text{max}}, ^\circ$               | 62.12                              | 62.494                             | 61.838                             | 62.24                              | 62.22                              |
| Reflections collected                        | 4589                               | 2474                               | 4183                               | 8525                               | 9252                               |
| Independent reflections ( $R_{\text{int}}$ ) | 3000 ( $R_{\text{int}} = 0.0162$ ) | 2052 ( $R_{\text{int}} = 0.0178$ ) | 3248 ( $R_{\text{int}} = 0.0782$ ) | 6260 ( $R_{\text{int}} = 0.0762$ ) | 3986 ( $R_{\text{int}} = 0.0181$ ) |
| $S$                                          | 0.943                              | 1.108                              | 0.864                              | 1.012                              | 1.110                              |
| $R_1 [I \geq 2\sigma(I)]$                    | 0.0384                             | 0.0381                             | 0.0467                             | 0.0602                             | 0.0464                             |
| $wR_2$                                       | 0.1328                             | 0.1108                             | 0.1182                             | 0.1211                             | 0.1176                             |
| Largest diff. peak/hole, $e \text{\AA}^{-3}$ | 0.74/-0.43                         | 0.42/-0.61                         | 0.43/-0.29                         | 0.75/-0.47                         | 0.32/-0.32                         |
| Flack parameter                              | n/a                                | -0.02(12)                          | -0.12(9)                           | -0.11(9)                           | n/a                                |

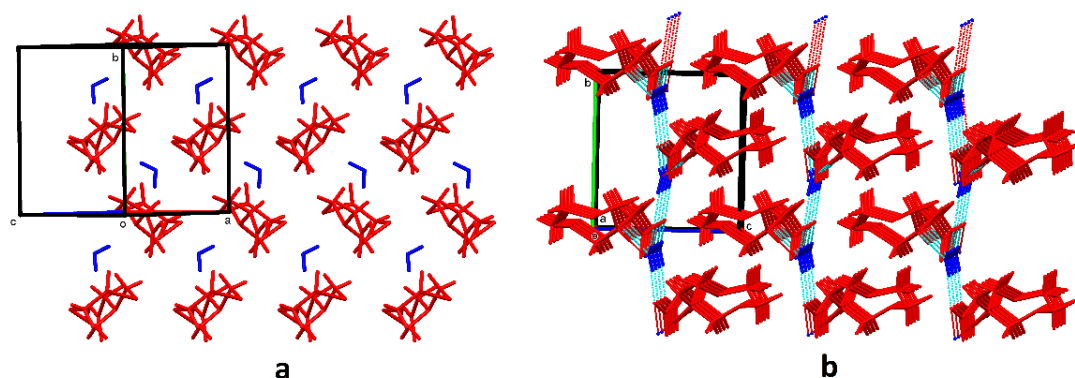

Fig. 1. Projections of clathrate **2a**: (a) along  $a$  axis and (b) along  $b$  axis. The molecules of the main compound are painted with red colour and water molecules are with blue colour.

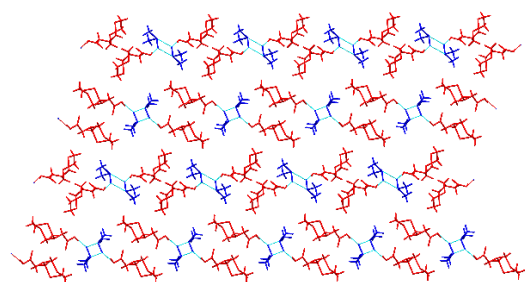

**a**

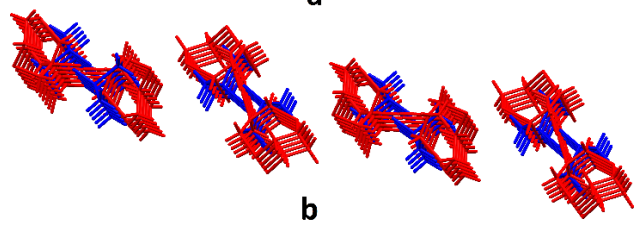

**b**

**Fig. 2.** Projections of tetrameric associates **2b** along two orthogonal axes. The molecules of the main compound are in red, whereas DMSO are in blue.
